# Supplementary material for: Soil Moisture Monitoring at Kilometer Scale: Assimilation of Sentinel-1 Products in ISBA
Source: MDPI journal article supplement (doi:10.3390/rs15174329), 2023-09-02
Supplement: s1 [file s1]

Archive with 1 entries (1 files):
- remotesensing-2486434-supplementary.pdf
