# Supplementary material for: Soil Moisture Monitoring at Kilometer Scale: Assimilation of Sentinel-1 Products in ISBA
Source: MDPI journal article supplement (doi:10.3390/rs15174329), 2023-09-02
Supplement: s1 [file s1 › remotesensing-2486434-supplementary.pdf]

# Soil moisture monitoring at kilometer scale: assimilation of Sentinel-1 products in ISBA

Oscar J. Rojas-Munoz<sup>1</sup>, Jean-Christophe Calvet<sup>1</sup>, Bertrand Bonan<sup>1</sup>, Nicolas Baghdadi<sup>2</sup>, Catherine Meurey<sup>1</sup>, Adrien Napoly<sup>1</sup>, Jean-Pierre Wigneron<sup>3</sup>, and Mehrez Zribi<sup>4</sup>

<sup>1</sup>CNRM, Université de Toulouse, Météo-France, CNRS, 31057 Toulouse, France

<sup>2</sup>INRAE, UMR TETIS, Université de Montpellier, AgroParisTech, 34093 Montpellier, France

<sup>3</sup>INRAE, UMR ISPA, Université de Bordeaux, 33140 Villenave d'Ornon, France

<sup>4</sup>CESBIO (CNES/CNRS/IRD/INRAE/UPS), 31401 Toulouse, France

## SUPPLEMENT

*Table S1. Correlation coefficient (R), unbiased root mean square difference (ubRMSD) and number of observations between S1 SSM products and the Meteopole-Flux, SMOSMANIA and REMEDHUS stations within the three regions considered in this study from 2017 to 2019, at 18:00 UTC. Correlation coefficient (ubRMSD) values larger (smaller) than 0.5 (0.05 m<sup>3</sup> m<sup>-3</sup>) are in bold.*

| Station               | Region      | R           | ubRMSD (m <sup>3</sup> m <sup>-3</sup> ) | Number |
|-----------------------|-------------|-------------|------------------------------------------|--------|
| Meteopole-Flux        | Toulouse    | <b>0.60</b> | 0.080                                    | 121    |
| Lahas                 | Toulouse    | 0.44        | 0.082                                    | 117    |
| Savenes               | Toulouse    | <b>0.64</b> | 0.076                                    | 121    |
| Saint-Felix-Lauragais | Toulouse    | <b>0.59</b> | <b>0.048</b>                             | 117    |
| Pezenas               | Montpellier | <b>0.66</b> | <b>0.035</b>                             | 169    |
| La Grand Combe        | Montpellier | <b>0.85</b> | <b>0.025</b>                             | 163    |
| Villevieille          | Montpellier | 0.40        | 0.091                                    | 176    |
| Canizal               | Salamanca   | <b>0.52</b> | 0.061                                    | 350    |
| Carretoro             | Salamanca   | 0.50        | <b>0.040</b>                             | 360    |
| Casa periles          | Salamanca   | 0.36        | 0.054                                    | 359    |
| Concejo del Monte     | Salamanca   | 0.50        | 0.059                                    | 342    |
| El Coto               | Salamanca   | 0.32        | <b>0.037</b>                             | 179    |
| El Tomillar           | Salamanca   | <b>0.54</b> | <b>0.032</b>                             | 171    |
| Granja G              | Salamanca   | 0.36        | 0.066                                    | 352    |
| Guarrati              | Salamanca   | 0.42        | 0.120                                    | 172    |
| La Cruz de Elias      | Salamanca   | 0.50        | <b>0.049</b>                             | 353    |
| Las Arenas            | Salamanca   | <b>0.57</b> | 0.066                                    | 171    |
| Las Bodegas           | Salamanca   | <b>0.60</b> | <b>0.041</b>                             | 165    |
| Las Brozas            | Salamanca   | 0.09 (*)    | 0.054                                    | 344    |
| Las Eritas            | Salamanca   | <b>0.65</b> | 0.054                                    | 181    |
| Las Tres Rayas        | Salamanca   | 0.48        | 0.066                                    | 181    |
| Las Vacas             | Salamanca   | <b>0.51</b> | <b>0.043</b>                             | 360    |
| Las Victorias         | Salamanca   | 0.49        | <b>0.036</b>                             | 355    |
| Llanos de la Boveda   | Salamanca   | 0.42        | 0.056                                    | 360    |
| Paredinas             | Salamanca   | <b>0.55</b> | <b>0.031</b>                             | 360    |
| Zamarron              | Salamanca   | <b>0.70</b> | <b>0.034</b>                             | 177    |

\* Non-significant correlation (P-value = 0.1)

Table S2. Correlation coefficient ( $R$ ), unbiased root mean square difference (ubRMSD), and mean bias (MB) between OL simulations, S1 SSM products, and in situ observations at Meteopole-Flux, SMOSMANIA, and REMEDHUS stations within the three regions considered in this study from 2017 to 2019 at 18:00 UTC. The best scores from the comparison with in situ observations are shown in bold.

#### Meteopole-Flux

| Comparison                | $R$         | ubRMSD<br>( $\text{m}^3 \text{m}^{-3}$ ) | RMSD<br>( $\text{m}^3 \text{m}^{-3}$ ) | MB<br>( $\text{m}^3 \text{m}^{-3}$ ) | Number |
|---------------------------|-------------|------------------------------------------|----------------------------------------|--------------------------------------|--------|
| OL vs. <i>in situ</i>     | <b>0.80</b> | <b>0.060</b>                             | <b>0.062</b>                           | <b>0.016</b>                         | 125    |
| S1 SSM vs. <i>in situ</i> | 0.60        | 0.080                                    | 0.082                                  | 0.017                                | 121    |
| S1 SSM vs. OL             | 0.57        | 0.052                                    | 0.104                                  | -0.090                               | 125    |

#### Lahas

| Comparison                | $R$         | ubRMSD<br>( $\text{m}^3 \text{m}^{-3}$ ) | RMSD<br>( $\text{m}^3 \text{m}^{-3}$ ) | MB<br>( $\text{m}^3 \text{m}^{-3}$ ) | Number |
|---------------------------|-------------|------------------------------------------|----------------------------------------|--------------------------------------|--------|
| OL vs. <i>in situ</i>     | <b>0.82</b> | <b>0.055</b>                             | <b>0.055</b>                           | <b>0.008</b>                         | 124    |
| S1 SSM vs. <i>in situ</i> | 0.44        | 0.082                                    | 0.135                                  | 0.107                                | 117    |
| S1 SSM vs. OL             | 0.55        | 0.054                                    | 0.114                                  | -0.100                               | 124    |

#### Savenes

| Comparison                | $R$         | ubRMSD<br>( $\text{m}^3 \text{m}^{-3}$ ) | RMSD<br>( $\text{m}^3 \text{m}^{-3}$ ) | MB<br>( $\text{m}^3 \text{m}^{-3}$ ) | Number |
|---------------------------|-------------|------------------------------------------|----------------------------------------|--------------------------------------|--------|
| OL vs. <i>in situ</i>     | <b>0.80</b> | <b>0.060</b>                             | <b>0.062</b>                           | <b>0.016</b>                         | 125    |
| S1 SSM vs. <i>in situ</i> | 0.64        | 0.076                                    | 0.096                                  | 0.058                                | 121    |
| S1 SSM vs. OL             | 0.78        | 0.038                                    | 0.057                                  | -0.043                               | 125    |

#### Saint-Felix-Lauragais

| Comparison                | $R$         | ubRMSD<br>( $\text{m}^3 \text{m}^{-3}$ ) | RMSD<br>( $\text{m}^3 \text{m}^{-3}$ ) | MB<br>( $\text{m}^3 \text{m}^{-3}$ ) | Number |
|---------------------------|-------------|------------------------------------------|----------------------------------------|--------------------------------------|--------|
| OL vs. <i>in situ</i>     | <b>0.82</b> | <b>0.042</b>                             | 0.111                                  | -0.103                               | 123    |
| S1 SSM vs. <i>in situ</i> | 0.59        | 0.048                                    | <b>0.049</b>                           | <b>0.006</b>                         | 117    |
| S1 SSM vs. OL             | 0.67        | 0.055                                    | 0.121                                  | -0.108                               | 122    |

#### Pezenas

| Comparison                | $R$         | ubRMSD<br>( $\text{m}^3 \text{m}^{-3}$ ) | RMSD<br>( $\text{m}^3 \text{m}^{-3}$ ) | MB<br>( $\text{m}^3 \text{m}^{-3}$ ) | Number |
|---------------------------|-------------|------------------------------------------|----------------------------------------|--------------------------------------|--------|
| OL vs. <i>in situ</i>     | <b>0.87</b> | <b>0.035</b>                             | 0.154                                  | -0.150                               | 173    |
| S1 SSM vs. <i>in situ</i> | 0.66        | <b>0.035</b>                             | <b>0.071</b>                           | <b>-0.062</b>                        | 169    |
| S1 SSM vs. OL             | 0.53        | 0.058                                    | 0.103                                  | -0.085                               | 173    |

#### Villevieille

| Comparison                | $R$         | ubRMSD<br>( $\text{m}^3 \text{m}^{-3}$ ) | RMSD<br>( $\text{m}^3 \text{m}^{-3}$ ) | MB<br>( $\text{m}^3 \text{m}^{-3}$ ) | Number |
|---------------------------|-------------|------------------------------------------|----------------------------------------|--------------------------------------|--------|
| OL vs. <i>in situ</i>     | <b>0.83</b> | <b>0.056</b>                             | <b>0.095</b>                           | -0.076                               | 180    |
| S1 SSM vs. <i>in situ</i> | 0.40        | 0.091                                    | 0.097                                  | <b>-0.034</b>                        | 176    |
| S1 SSM vs. OL             | 0.55        | 0.063                                    | 0.076                                  | -0.043                               | 177    |

#### La Grand-Combe

| Comparison                | $R$         | ubRMSD<br>( $\text{m}^3 \text{m}^{-3}$ ) | RMSD<br>( $\text{m}^3 \text{m}^{-3}$ ) | MB<br>( $\text{m}^3 \text{m}^{-3}$ ) | Number |
|---------------------------|-------------|------------------------------------------|----------------------------------------|--------------------------------------|--------|
| OL vs. <i>in situ</i>     | <b>0.87</b> | 0.043                                    | 0.165                                  | 0.159                                | 165    |
| S1 SSM vs. <i>in situ</i> | 0.85        | <b>0.024</b>                             | <b>0.028</b>                           | <b>-0.013</b>                        | 163    |
| S1 SSM vs. OL             | 0.71        | 0.058                                    | 0.156                                  | -0.145                               | 164    |

**Canizal**

| Comparison                | <i>R</i>    | ubRMSD<br>(m <sup>3</sup> m <sup>-3</sup> ) | RMSD<br>(m <sup>3</sup> m <sup>-3</sup> ) | MB<br>(m <sup>3</sup> m <sup>-3</sup> ) | Number |
|---------------------------|-------------|---------------------------------------------|-------------------------------------------|-----------------------------------------|--------|
| OL vs. <i>in situ</i>     | <b>0.70</b> | <b>0.050</b>                                | <b>0.051</b>                              | <b>0.007</b>                            | 353    |
| S1 SSM vs. <i>in situ</i> | 0.52        | 0.061                                       | 0.086                                     | 0.060                                   | 350    |
| S1 SSM vs. OL             | 0.54        | 0.057                                       | 0.076                                     | -0.051                                  | 353    |

**Carretoro**

| Comparison                | <i>R</i>    | ubRMSD<br>(m <sup>3</sup> m <sup>-3</sup> ) | RMSD<br>(m <sup>3</sup> m <sup>-3</sup> ) | MB<br>(m <sup>3</sup> m <sup>-3</sup> ) | Number |
|---------------------------|-------------|---------------------------------------------|-------------------------------------------|-----------------------------------------|--------|
| OL vs. <i>in situ</i>     | <b>0.68</b> | 0.045                                       | 0.157                                     | -0.150                                  | 361    |
| S1 SSM vs. <i>in situ</i> | 0.50        | <b>0.040</b>                                | <b>0.104</b>                              | <b>-0.095</b>                           | 360    |
| S1 SSM vs. OL             | 0.55        | 0.055                                       | 0.071                                     | -0.046                                  | 361    |

**Casa periles**

| Comparison                | <i>R</i>    | ubRMSD<br>(m <sup>3</sup> m <sup>-3</sup> ) | RMSD<br>(m <sup>3</sup> m <sup>-3</sup> ) | MB<br>(m <sup>3</sup> m <sup>-3</sup> ) | Number |
|---------------------------|-------------|---------------------------------------------|-------------------------------------------|-----------------------------------------|--------|
| OL vs. <i>in situ</i>     | <b>0.79</b> | <b>0.034</b>                                | 0.175                                     | -0.171                                  | 360    |
| S1 SSM vs. <i>in situ</i> | 0.36        | 0.054                                       | <b>0.057</b>                              | <b>-0.020</b>                           | 359    |
| S1 SSM vs. OL             | 0.64        | 0.044                                       | 0.157                                     | -0.150                                  | 360    |

**Concejo del Monte**

| Comparison                | <i>R</i>    | ubRMSD<br>(m <sup>3</sup> m <sup>-3</sup> ) | RMSD<br>(m <sup>3</sup> m <sup>-3</sup> ) | MB<br>(m <sup>3</sup> m <sup>-3</sup> ) | Number |
|---------------------------|-------------|---------------------------------------------|-------------------------------------------|-----------------------------------------|--------|
| OL vs. <i>in situ</i>     | <b>0.62</b> | <b>0.055</b>                                | <b>0.057</b>                              | <b>-0.012</b>                           | 348    |
| S1 SSM vs. <i>in situ</i> | 0.50        | 0.059                                       | 0.108                                     | 0.091                                   | 342    |
| S1 SSM vs. OL             | 0.63        | 0.048                                       | 0.115                                     | -0.104                                  | 348    |

**El Coto**

| Comparison                | <i>R</i>    | ubRMSD<br>(m <sup>3</sup> m <sup>-3</sup> ) | RMSD<br>(m <sup>3</sup> m <sup>-3</sup> ) | MB<br>(m <sup>3</sup> m <sup>-3</sup> ) | Number |
|---------------------------|-------------|---------------------------------------------|-------------------------------------------|-----------------------------------------|--------|
| OL vs. <i>in situ</i>     | <b>0.44</b> | 0.054                                       | 0.229                                     | -0.222                                  | 181    |
| S1 SSM vs. <i>in situ</i> | 0.32        | <b>0.037</b>                                | <b>0.081</b>                              | <b>-0.072</b>                           | 179    |
| S1 SSM vs. OL             | 0.62        | 0.047                                       | 0.146                                     | -0.139                                  | 181    |

**El Tomillar**

| Comparison                | <i>R</i>    | ubRMSD<br>(m <sup>3</sup> m <sup>-3</sup> ) | RMSD<br>(m <sup>3</sup> m <sup>-3</sup> ) | MB<br>(m <sup>3</sup> m <sup>-3</sup> ) | Number |
|---------------------------|-------------|---------------------------------------------|-------------------------------------------|-----------------------------------------|--------|
| OL vs. <i>in situ</i>     | <b>0.62</b> | 0.044                                       | 0.273                                     | -0.270                                  | 173    |
| S1 SSM vs. <i>in situ</i> | 0.54        | <b>0.032</b>                                | <b>0.089</b>                              | <b>-0.083</b>                           | 171    |
| S1 SSM vs. OL             | 0.54        | 0.046                                       | 0.192                                     | -0.187                                  | 173    |

**Granja G**

| Comparison                | <i>R</i>    | ubRMSD<br>(m <sup>3</sup> m <sup>-3</sup> ) | RMSD<br>(m <sup>3</sup> m <sup>-3</sup> ) | MB<br>(m <sup>3</sup> m <sup>-3</sup> ) | Number |
|---------------------------|-------------|---------------------------------------------|-------------------------------------------|-----------------------------------------|--------|
| OL vs. <i>in situ</i>     | <b>0.82</b> | <b>0.038</b>                                | 0.128                                     | -0.122                                  | 355    |
| S1 SSM vs. <i>in situ</i> | 0.36        | 0.066                                       | <b>0.082</b>                              | <b>-0.048</b>                           | 352    |
| S1 SSM vs. OL             | 0.35        | 0.059                                       | 0.094                                     | -0.073                                  | 355    |

**Guarrati**

| Comparison                | <i>R</i>    | ubRMSD<br>(m <sup>3</sup> m <sup>-3</sup> ) | RMSD<br>(m <sup>3</sup> m <sup>-3</sup> ) | MB<br>(m <sup>3</sup> m <sup>-3</sup> ) | Number |
|---------------------------|-------------|---------------------------------------------|-------------------------------------------|-----------------------------------------|--------|
| OL vs. <i>in situ</i>     | <b>0.69</b> | <b>0.101</b>                                | <b>0.105</b>                              | <b>-0.029</b>                           | 175    |
| S1 SSM vs. <i>in situ</i> | 0.42        | 0.120                                       | 0.152                                     | 0.098                                   | 172    |
| S1 SSM vs. OL             | 0.61        | 0.0423                                      | 0.135                                     | -0.128                                  | 174    |

**La Cruz de Elias**

| Comparison                | <i>R</i>    | ubRMSD<br>(m <sup>3</sup> m <sup>-3</sup> ) | RMSD<br>(m <sup>3</sup> m <sup>-3</sup> ) | MB<br>(m <sup>3</sup> m <sup>-3</sup> ) | Number |
|---------------------------|-------------|---------------------------------------------|-------------------------------------------|-----------------------------------------|--------|
| OL vs. <i>in situ</i>     | <b>0.76</b> | <b>0.039</b>                                | 0.085                                     | -0.076                                  | 360    |
| S1 SSM vs. <i>in situ</i> | 0.50        | 0.049                                       | <b>0.050</b>                              | <b>-0.010</b>                           | 353    |
| S1 SSM vs. OL             | 0.62        | 0.047                                       | 0.081                                     | -0.066                                  | 360    |

**Las Arenas**

| Comparison                | <i>R</i>    | ubRMSD<br>(m <sup>3</sup> m <sup>-3</sup> ) | RMSD<br>(m <sup>3</sup> m <sup>-3</sup> ) | MB<br>(m <sup>3</sup> m <sup>-3</sup> ) | Number |
|---------------------------|-------------|---------------------------------------------|-------------------------------------------|-----------------------------------------|--------|
| OL vs. <i>in situ</i>     | <b>0.75</b> | <b>0.053</b>                                | 0.133                                     | -0.122                                  | 174    |
| S1 SSM vs. <i>in situ</i> | 0.57        | 0.066                                       | <b>0.082</b>                              | <b>0.048</b>                            | 171    |
| S1 SSM vs. OL             | 0.68        | 0.037                                       | 0.174                                     | -0.170                                  | 174    |

**Las Bodegas**

| Comparison                | <i>R</i>    | ubRMSD<br>(m <sup>3</sup> m <sup>-3</sup> ) | RMSD<br>(m <sup>3</sup> m <sup>-3</sup> ) | MB<br>(m <sup>3</sup> m <sup>-3</sup> ) | Number |
|---------------------------|-------------|---------------------------------------------|-------------------------------------------|-----------------------------------------|--------|
| OL vs. <i>in situ</i>     | <b>0.83</b> | <b>0.036</b>                                | 0.085                                     | -0.078                                  | 169    |
| S1 SSM vs. <i>in situ</i> | 0.60        | 0.041                                       | <b>0.041</b>                              | <b>0.001</b>                            | 165    |
| S1 SSM vs. OL             | 0.65        | 0.049                                       | 0.094                                     | -0.080                                  | 169    |

**Las Brozas**

| Comparison                | <i>R</i>    | ubRMSD<br>(m <sup>3</sup> m <sup>-3</sup> ) | RMSD<br>(m <sup>3</sup> m <sup>-3</sup> ) | MB<br>(m <sup>3</sup> m <sup>-3</sup> ) | Number |
|---------------------------|-------------|---------------------------------------------|-------------------------------------------|-----------------------------------------|--------|
| OL vs. <i>in situ</i>     | <b>0.54</b> | <b>0.053</b>                                | 0.163                                     | -0.154                                  | 347    |
| S1 SSM vs. <i>in situ</i> | 0.09        | 0.054                                       | <b>0.110</b>                              | <b>-0.096</b>                           | 344    |
| S1 SSM vs. OL             | 0.08        | 0.063                                       | 0.086                                     | -0.058                                  | 347    |

**Las Eritas**

| Comparison                | <i>R</i>    | ubRMSD<br>(m <sup>3</sup> m <sup>-3</sup> ) | RMSD<br>(m <sup>3</sup> m <sup>-3</sup> ) | MB<br>(m <sup>3</sup> m <sup>-3</sup> ) | Number |
|---------------------------|-------------|---------------------------------------------|-------------------------------------------|-----------------------------------------|--------|
| OL vs. <i>in situ</i>     | <b>0.75</b> | <b>0.046</b>                                | <b>0.049</b>                              | <b>-0.015</b>                           | 185    |
| S1 SSM vs. <i>in situ</i> | 0.65        | 0.054                                       | 0.158                                     | 0.149                                   | 181    |
| S1 SSM vs. OL             | 0.78        | 0.036                                       | 0.168                                     | -0.164                                  | 185    |

**Las Tres Rayas**

| Comparison                | <i>R</i>    | ubRMSD<br>(m <sup>3</sup> m <sup>-3</sup> ) | RMSD<br>(m <sup>3</sup> m <sup>-3</sup> ) | MB<br>(m <sup>3</sup> m <sup>-3</sup> ) | Number |
|---------------------------|-------------|---------------------------------------------|-------------------------------------------|-----------------------------------------|--------|
| OL vs. <i>in situ</i>     | <b>0.59</b> | <b>0.063</b>                                | 0.154                                     | -0.140                                  | 185    |
| S1 SSM vs. <i>in situ</i> | 0.48        | 0.066                                       | <b>0.088</b>                              | <b>-0.059</b>                           | 181    |
| S1 SSM vs. OL             | 0.65        | 0.047                                       | 0.093                                     | -0.081                                  | 185    |

**Las Vacas**

| Comparison                | <i>R</i>    | ubRMSD<br>(m <sup>3</sup> m <sup>-3</sup> ) | RMSD<br>(m <sup>3</sup> m <sup>-3</sup> ) | MB<br>(m <sup>3</sup> m <sup>-3</sup> ) | Number |
|---------------------------|-------------|---------------------------------------------|-------------------------------------------|-----------------------------------------|--------|
| OL vs. <i>in situ</i>     | <b>0.82</b> | <b>0.036</b>                                | 0.153                                     | -0.148                                  | 361    |
| S1 SSM vs. <i>in situ</i> | 0.51        | 0.043                                       | <b>0.073</b>                              | <b>-0.059</b>                           | 360    |
| S1 SSM vs. OL             | 0.45        | 0.057                                       | 0.106                                     | -0.090                                  | 361    |

**Las Victorias**

| Comparison                | <i>R</i>    | ubRMSD<br>(m <sup>3</sup> m <sup>-3</sup> ) | RMSD<br>(m <sup>3</sup> m <sup>-3</sup> ) | MB<br>(m <sup>3</sup> m <sup>-3</sup> ) | Number |
|---------------------------|-------------|---------------------------------------------|-------------------------------------------|-----------------------------------------|--------|
| OL vs. <i>in situ</i>     | <b>0.58</b> | 0.046                                       | 0.278                                     | -0.274                                  | 357    |
| S1 SSM vs. <i>in situ</i> | 0.49        | <b>0.036</b>                                | <b>0.146</b>                              | <b>-0.141</b>                           | 355    |
| S1 SSM vs. OL             | 0.61        | 0.045                                       | 0.141                                     | -0.133                                  | 357    |

**Llanos de la Boveda**

| Comparison                | <i>R</i>    | ubRMSD<br>(m <sup>3</sup> m <sup>-3</sup> ) | RMSD<br>(m <sup>3</sup> m <sup>-3</sup> ) | MB<br>(m <sup>3</sup> m <sup>-3</sup> ) | Number |
|---------------------------|-------------|---------------------------------------------|-------------------------------------------|-----------------------------------------|--------|
| OL vs. <i>in situ</i>     | <b>0.78</b> | <b>0.039</b>                                | 0.107                                     | -0.100                                  | 361    |
| S1 SSM vs. <i>in situ</i> | 0.42        | 0.056                                       | <b>0.063</b>                              | <b>0.028</b>                            | 360    |
| S1 SSM vs. OL             | 0.55        | 0.047                                       | 0.136                                     | -0.128                                  | 361    |

**Paredinas**

| Comparison                | <i>R</i>    | ubRMSD<br>(m <sup>3</sup> m <sup>-3</sup> ) | RMSD<br>(m <sup>3</sup> m <sup>-3</sup> ) | MB<br>(m <sup>3</sup> m <sup>-3</sup> ) | Number |
|---------------------------|-------------|---------------------------------------------|-------------------------------------------|-----------------------------------------|--------|
| OL vs. <i>in situ</i>     | <b>0.70</b> | 0.044                                       | 0.212                                     | -0.208                                  | 360    |
| S1 SSM vs. <i>in situ</i> | 0.55        | <b>0.031</b>                                | <b>0.103</b>                              | <b>-0.099</b>                           | 360    |
| S1 SSM vs. OL             | 0.53        | 0.048                                       | 0.120                                     | -0.109                                  | 360    |

**Zamarron**

| Comparison                | <i>R</i>    | ubRMSD<br>(m <sup>3</sup> m <sup>-3</sup> ) | RMSD<br>(m <sup>3</sup> m <sup>-3</sup> ) | MB<br>(m <sup>3</sup> m <sup>-3</sup> ) | Number |
|---------------------------|-------------|---------------------------------------------|-------------------------------------------|-----------------------------------------|--------|
| OL vs. <i>in situ</i>     | <b>0.83</b> | <b>0.032</b>                                | 0.211                                     | -0.209                                  | 180    |
| S1 SSM vs. <i>in situ</i> | 0.70        | 0.034                                       | <b>0.086</b>                              | <b>-0.079</b>                           | 177    |
| S1 SSM vs. OL             | 0.73        | 0.040                                       | 0.136                                     | -0.130                                  | 180    |

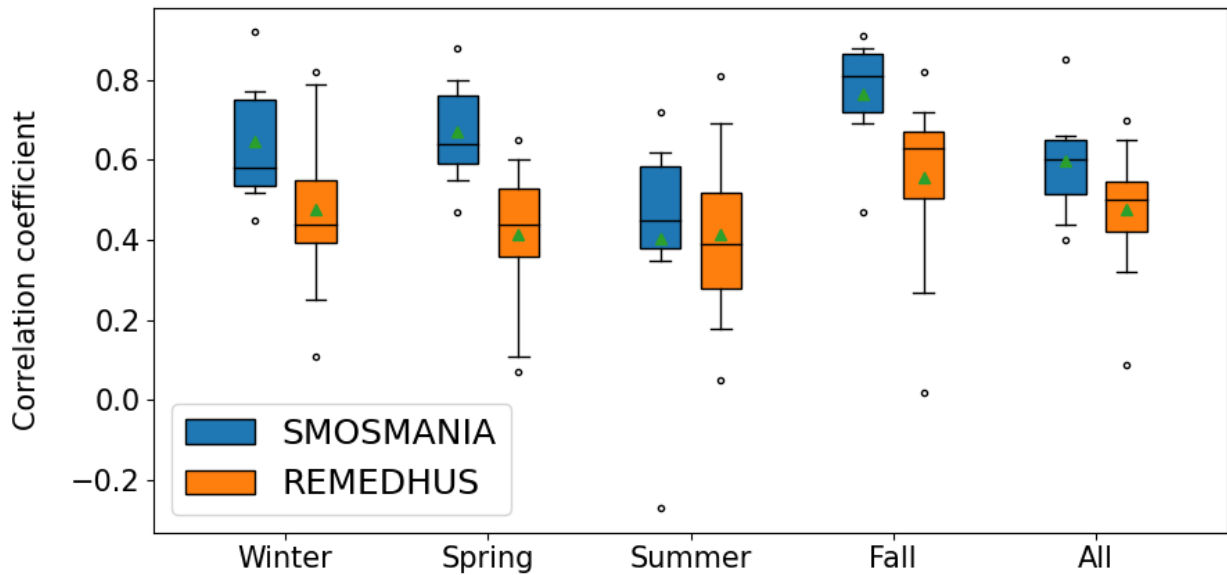

Figure S1. Correlation coefficient distributions of S1 SSM for the 7 SMOSMANIA stations in southern France (blue) and the 19 REMEDHUS stations of Salamanca (orange), for the four seasons of the year and for all the period of study. Freezing cases are sorted out by excluding data for which soil temperature at -5 cm is less than 4 °C. Statistical distributions are represented by box-and-whisker plots, where the boxes indicate the 25th and 75th data percentiles, the whiskers indicate the 5th and 95th percentiles, the middle line represents the median, the green triangle the mean, and the outliers shown as dots.

The paper focuses on the Montpellier region. The three assimilation experiments were also performed for the other two regions where Sentinel-1 surface soil moisture products (S1 SSM) at 1 km spatial resolution are available. The three experiments are:

- (1) assimilation of S1 SSM alone,
- (2) assimilation of PROBA-V Leaf Area Index (LAI) alone, and
- (3) the joint assimilation of these two satellite products.

## I. Toulouse region

The land cover map from Copernicus Global Land Service is shown in Fig. S1, with the irrigation map from Meier et al. (2018). This region is predominantly covered with croplands in the southwestern part where the SMOSMANIA and stations are located. The rest of the region consists of both open and closed forests. The irrigation map from Meier et al. (2018) indicates that only a few cropland areas are irrigated

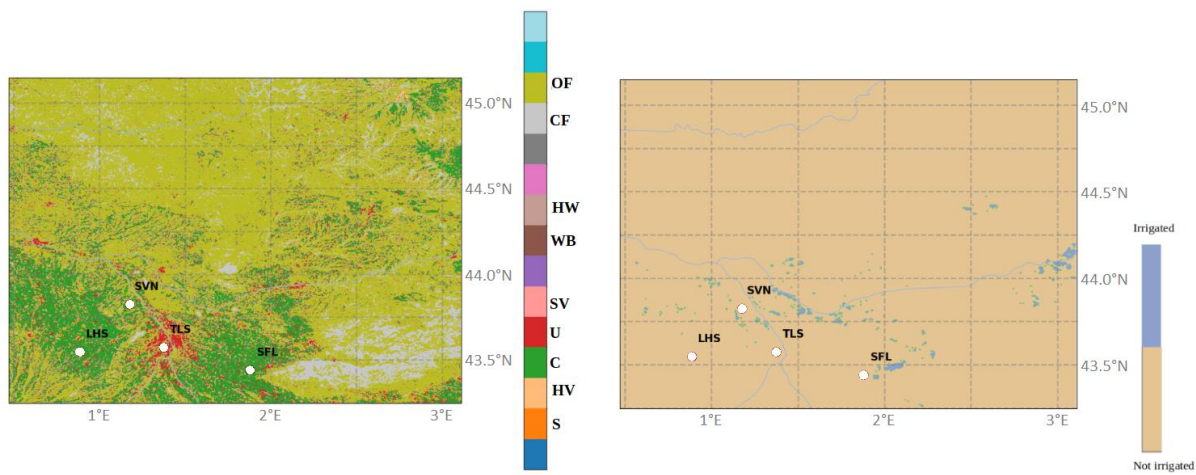

Figure S2. Land cover classification from CGLS (left) and irrigation map from Meier et al. (2018) (right) for the Toulouse region. Lands cover classes: Open forest (“OF”), closed forest (“CF”), herbaceous wetland (“HW”), permanent water bodies (“WB”), sparse vegetation (“SV”), urban (“U”), cropland (“C”), herbaceous vegetation (“HV”) and shrubs (“S”). The location of the SMOSMANIA stations is shown (white dots).

Figure S2 illustrates the open-loop and analysis differences between July 2019 and July 2018 for the Toulouse region at 30 cm soil depth (WG5). Negative differences (red) are spotted at the southwestern and northeastern parts, and for mostly the rest of the domain July 2019 was drier than July 2018. Figure S3 shows the results of the three modeling experiments carried out and their impact on WG5. The impact of the assimilation of S1 SSM alone is small, except for an area in the northeast. The assimilation of LAI has a larger impact on WG5.

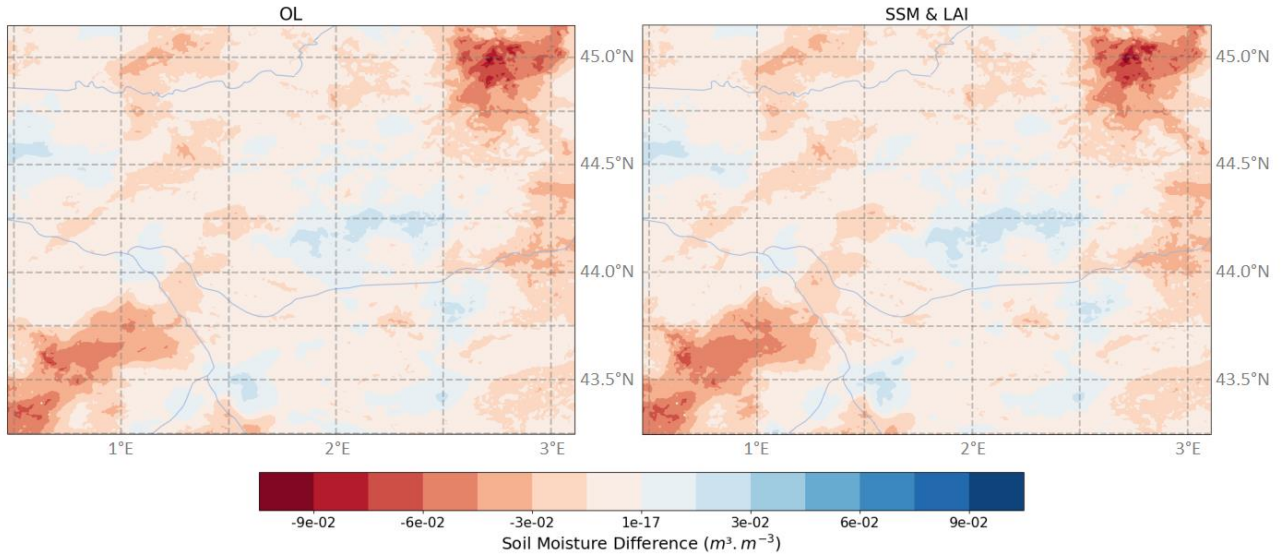

Figure S3. Map over the Toulouse domain of the WG5 difference between the averaged values of July 2019 and July 2018 from (left) the open-loop and (right) the joint assimilation of SSM and LAI.

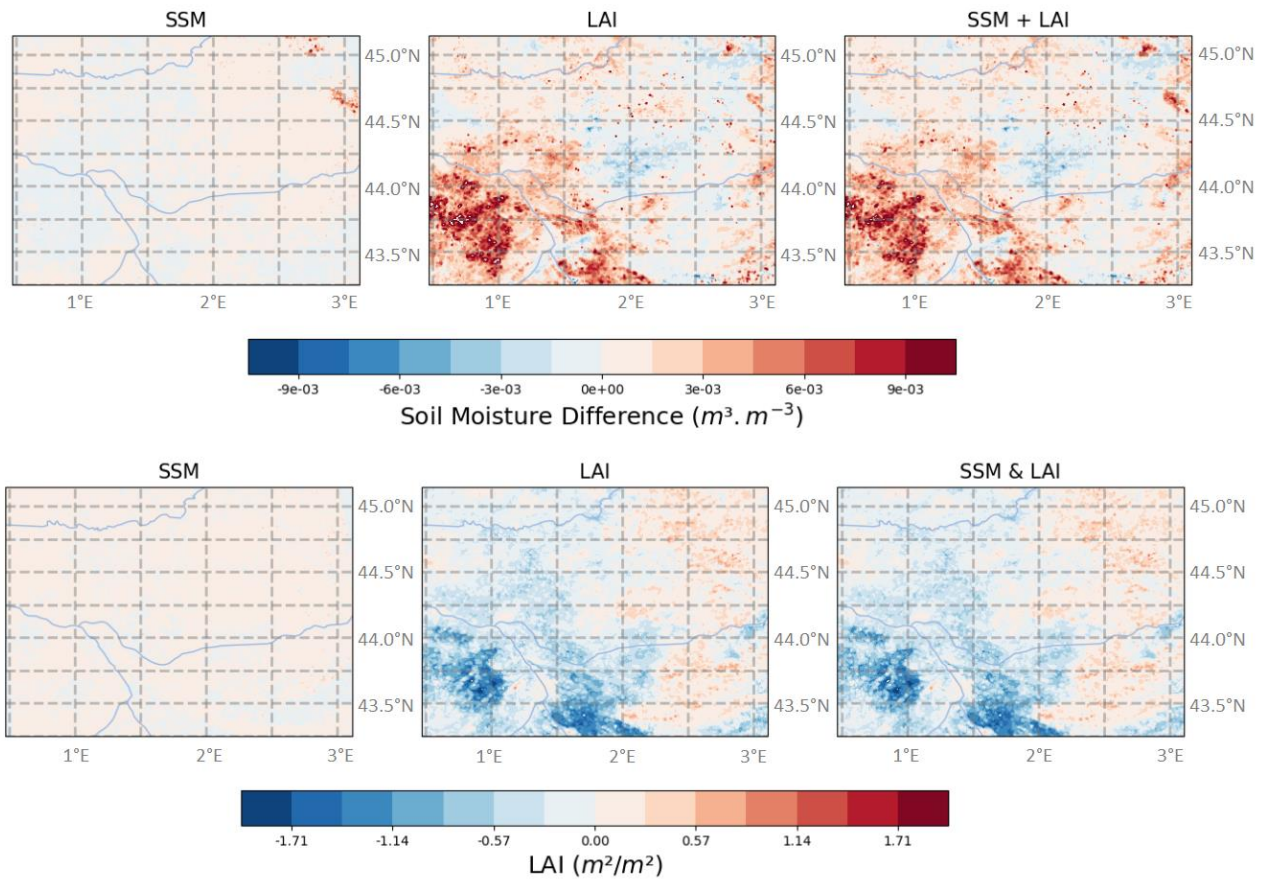

Figure S4. Year-to-year evolution from 2018 to 2019 over the Toulouse domain of the mean differences in July between (top) analyzed and open-loop WG5 and (bottom) LAI, when (left) S1 SSM is assimilated alone, (center) PROBA-V LAI is assimilated alone, (right) SSM and LAI are jointly assimilated. The red (blue) color indicates that the analysis adds (remove) water to the root-zone and increases (decreases) LAI more in 2019 than in 2018 in response to the assimilation.

## II. Salamanca region

As for the Toulouse and Montpellier regions, the added value of the assimilation of S1 SSM is investigated. Figure S4 displays the land cover map of the Salamanca region, where croplands are primarily distributed between the cities of Salamanca and Valladolid, as well as in the north and northeastern parts. The rest of the region is characterized by open forest.

The irrigation map in Fig. S4 shows that most of the irrigated areas in the southwest are covered by open forest, with some croplands interspersed between them. It is noteworthy that Meier et al. (2018) [1] used different irrigation maps and gathered with their own, and that's why one can detect two other irrigation colors with respect to Figure S1.

Figure S5 presents the open-loop and analysis differences for WG5 between July 2019 and July 2018. The majority of the region is depicted in red, indicating more humid conditions in July 2018, with the northwestern part exhibiting a more accentuated difference.

The results of the three assimilation experiments are illustrated in Fig. S6. For this specific case, no impact is observed when S1 SSM products are assimilated, as the difference between the two years is close to zero. In contrast, LAI assimilation impacts WG5 primarily in the cropland areas, augmenting LAI compared to July 2018 and the open-loop.

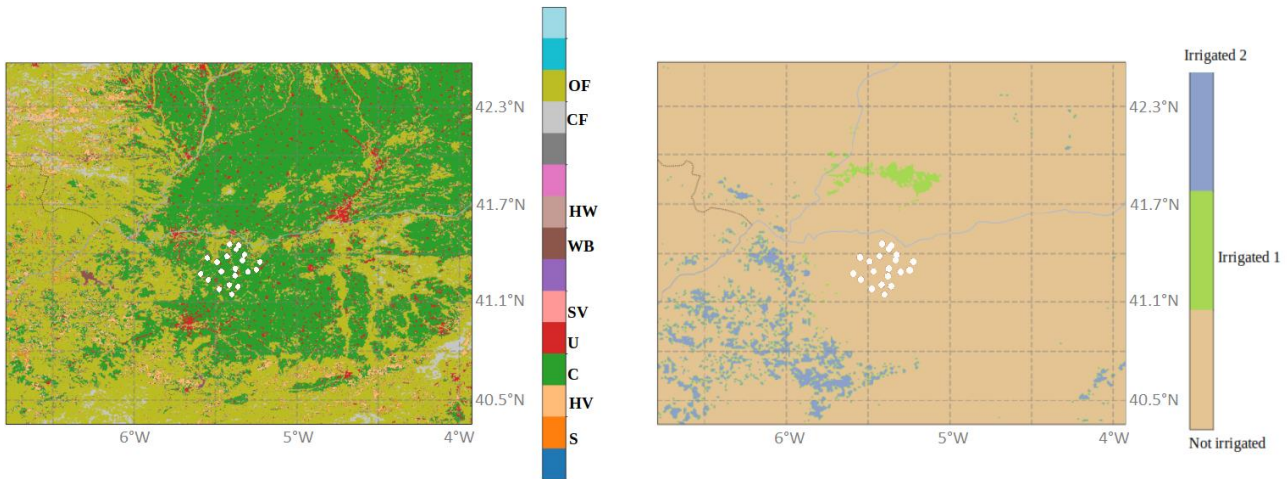

Figure S5. Land cover classification (left) and irrigation maps (right) for the Salamanca region (from Meier et al. (2018)). Lands cover classes: Open forest (“OF”), closed forest (“CF”), herbaceous wetland (“HW”), permanent water bodies (“WB”), sparse vegetation (“SV”), urban (“U”), cropland (“C”), herbaceous vegetation (“HV”) and shrubs (“S”). The location of the REMEDHUS stations is shown (white dots).

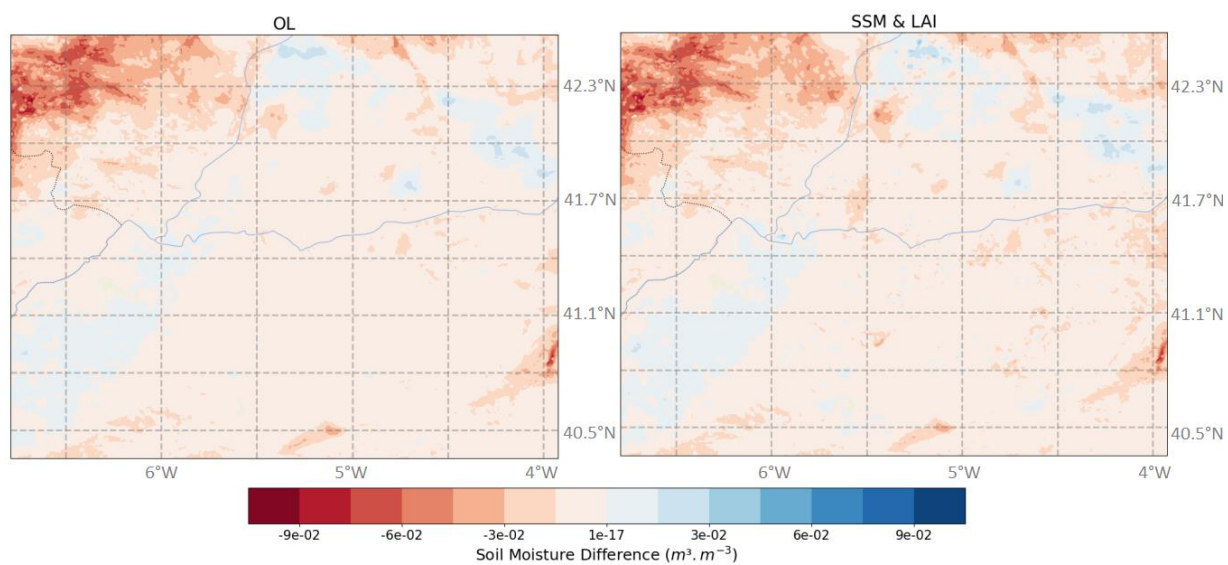

Figure S6. Map over the Salamanca domain of the WG5 difference between the averaged values of July 2019 and July 2018 from (left) the open-loop and (right) the joint assimilation of SSM and LAI.

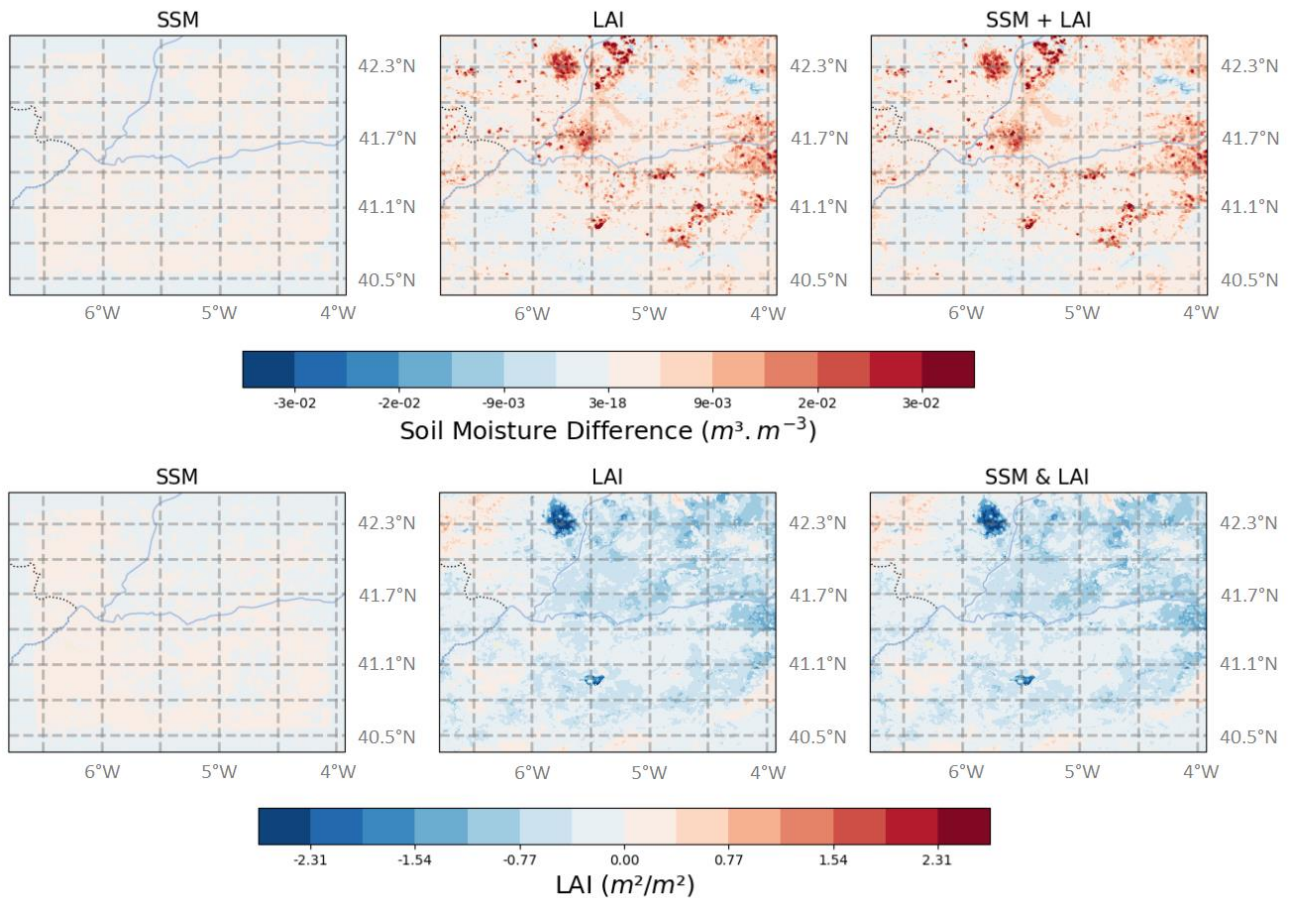

Figure S7. Year-to-year evolution from 2018 to 2019 over the Salamanca domain of the mean differences in July between (top) analyzed and open-loop WG5 and (bottom) LAI, when (left) S1 SSM is assimilated alone, (center) PROBA-V LAI is assimilated alone, (right) SSM and LAI are jointly assimilated. The red (blue) color indicates that the analysis adds (remove) water to the root-zone and increases (decreases) LAI more in 2019 than in 2018 in response to the assimilation.

## References

Meier, J.; Zabel, F.; Mauser, W. A Global Approach to Estimate Irrigated Areas – a Comparison between Different Data and Statistics. *Hydrology and Earth System Sciences* **2018**, *22*, 1119–1133, <https://doi.org/10.5194/hess-22-1119-2018>.
